# Supplementary material
Source: publisher site journal article supplement (https://www.spandidos-publications.com/8619/downloadSupplementary)
Supplement: Supplementary file 1 [file downloadSupplementary]

Table SI. Detailed article search strategy.

| Database         | Search strategy                                                                                                                                                                                                                                                                                                                                                                                                                                                                                |
|------------------|------------------------------------------------------------------------------------------------------------------------------------------------------------------------------------------------------------------------------------------------------------------------------------------------------------------------------------------------------------------------------------------------------------------------------------------------------------------------------------------------|
| PubMed           | <p>((((Lactic Dehydrogenase-to-albumin Ratio[Title/Abstract]) OR (Lactic Dehydrogenase to albumin Ratio[Title/Abstract])) OR (Lactic Dehydrogenase-albumin Ratio[Title/Abstract])) OR (Lactic Dehydrogenase/albumin Ratio[Title/Abstract])) OR (((Lactate Dehydrogenase-to-albumin Ratio[Title/Abstract]) OR (Lactate Dehydrogenase to albumin Ratio[Title/Abstract])) OR (Lactate Dehydrogenase-albumin Ratio[Title/Abstract])) OR (Lactate Dehydrogenase/albumin Ratio[Title/Abstract]))</p> |
| Embase           | <p>('lactic dehydrogenase-to-albumin ratio',ab OR 'lactic dehydrogenase to albumin ratio',ab OR 'lactic dehydrogenase-albumin ratio',ab OR 'lactic dehydrogenase/albumin ratio',ab OR 'lactate dehydrogenase-to-albumin ratio',ab OR 'lactate dehydrogenase to albumin ratio',ab OR 'lactate dehydrogenase-albumin ratio',ab OR 'lactate dehydrogenase/albumin ratio',ab) AND [humans]/lim AND [english]/lim</p>                                                                               |
| Cochrane Library | <p>#1 "Lactic Dehydrogenase-to-albumin Ratio",ab,kw #2 "Lactic Dehydrogenase to albumin Ratio",ab,kw #3 "Lactic Dehydrogenase-albumin Ratio",ab,kw #4 "Lactic Dehydrogenase/albumin Ratio",ab,kw #5 "Lactate Dehydrogenase-to-albumin Ratio",ab,kw #6 "Lactate Dehydrogenase to albumin Ratio",ab,kw #7 "Lactate Dehydrogenase-albumin Ratio",ab,kw #8 "Lactate Dehydrogenase/albumin Ratio",ab,kw #9 #1 OR #2 OR #3 OR #4 OR #5 OR #6 OR #7 OR #8</p>                                         |
